# Supplementary material for: Slow viral propagation during initial phase of infection leads to viral persistence in mice
Source: PubMed Central journal article supplement (PMC8084999; doi:10.1038/s42003-021-02028-x), 2021-04-29
Supplement: 42003_2021_2028_MOESM1_ESM.pdf [file 42003_2021_2028_MOESM1_ESM.pdf]

**Title: Slow viral propagation during initial phase of infection leads to viral persistence in mice**

Haifeng C. Xu<sup>1\*</sup>, Ruifeng Wang<sup>1\*</sup>, Prashant V Shinde<sup>1</sup>, Lara Walotka<sup>2</sup>, Anfei Huang<sup>1</sup>, Gereon Poschmann<sup>3</sup>, Jun Huang<sup>1</sup>, Wei Liu<sup>1,4</sup>, Kai Stühler<sup>3,5</sup>, Heiner Schaal<sup>2</sup>, Andreas Bergthaler<sup>6</sup>, Aleksandra A. Pandyra<sup>1,4</sup>, Cornelia Hardt<sup>7</sup>, Karl S. Lang<sup>7</sup>, Philipp A. Lang<sup>1#</sup>

<sup>1</sup>Department of Molecular Medicine II, Medical Faculty, Heinrich Heine University, Universitätsstr. 1, 40225 Düsseldorf, Germany, <sup>2</sup>Institute of Virology, Medical Faculty, Heinrich Heine University Düsseldorf, D-40225 Düsseldorf, Germany. <sup>3</sup>Institute of Molecular Medicine I, Proteome research, Medical Faculty, Heinrich-Heine University Düsseldorf, Universitätsstraße 1, 40225 Düsseldorf, Germany, <sup>4</sup>Department of Pediatric Oncology, Hematology, and Clinical Immunology, Medical Faculty, Heinrich Heine University, Universitätsstr. 1, 40225 Düsseldorf, Germany, <sup>5</sup>Molecular Proteomics Laboratory, Biomedical Research Center (BMFZ), Heinrich-Heine-Universität, Düsseldorf, Medical Faculty, Duesseldorf, Germany, <sup>6</sup>CeMM Research Center for Molecular Medicine of the Austrian Academy of Sciences, Lazarettgasse 14 AKH BT25.3, 1090 Vienna, Austria, <sup>7</sup>Institute of Immunology, Medical Faculty, University of Duisburg-Essen, Essen, Germany.

\*These authors contributed equally to this work.

#Address correspondence to PAL: langp@uni-duesseldorf.de

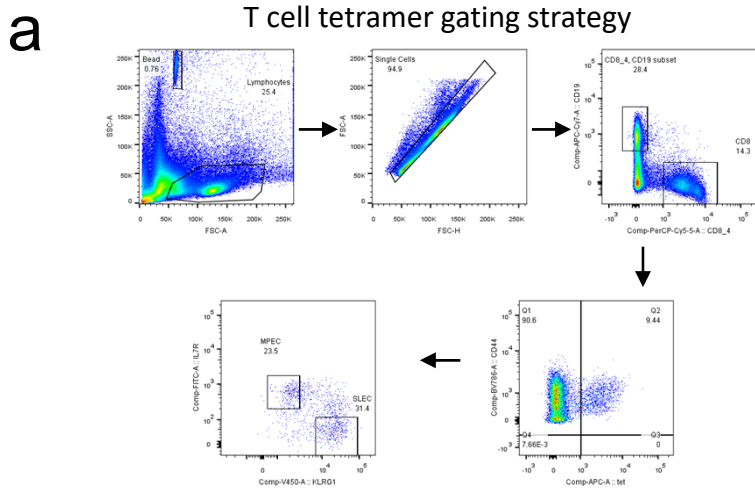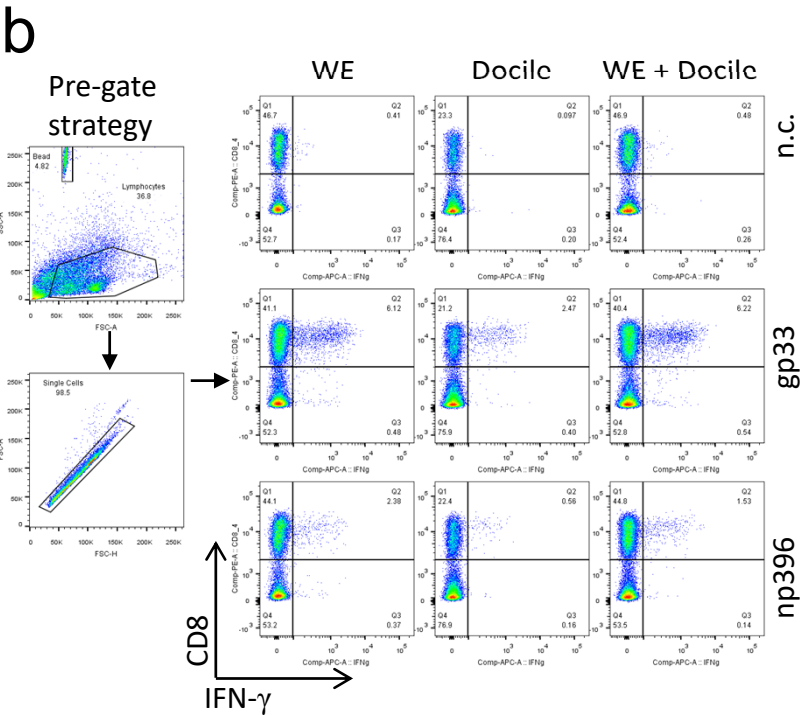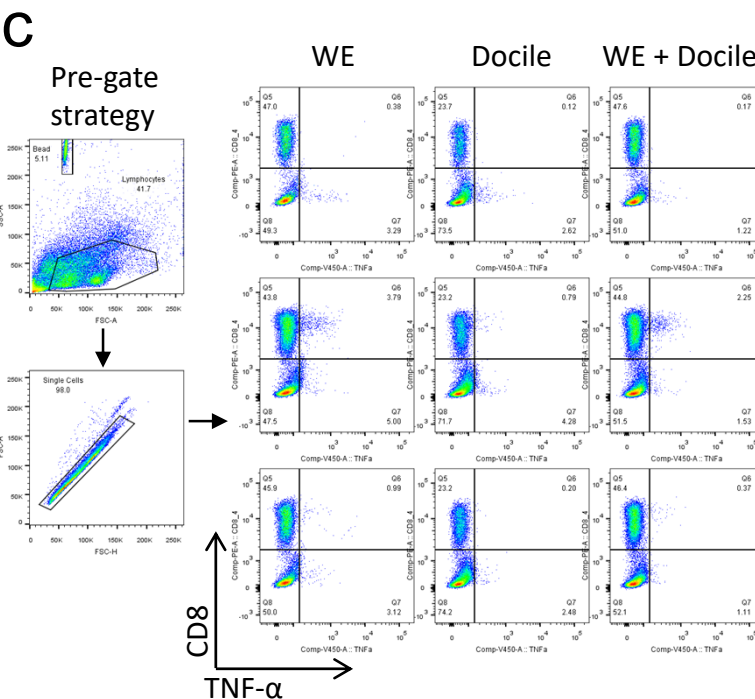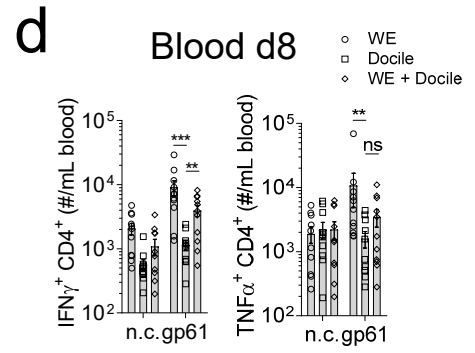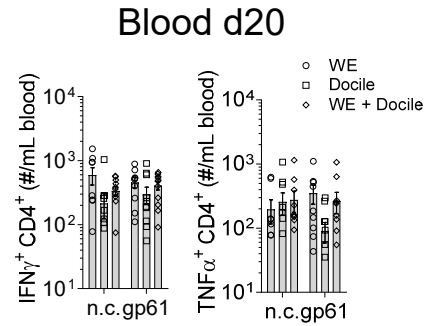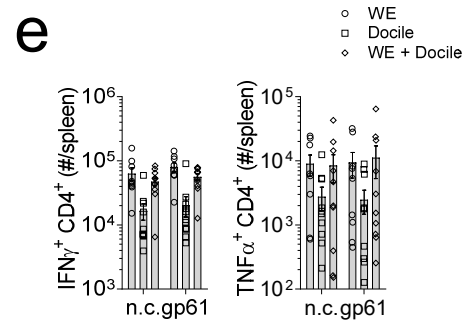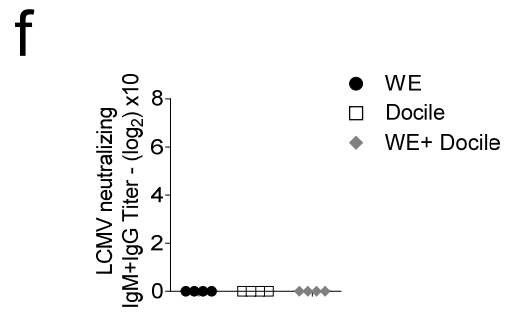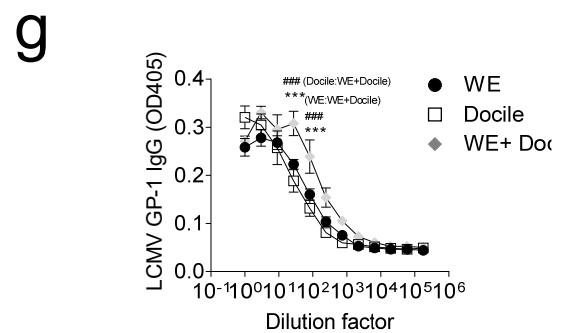

**Supplementary Figure 1: TNF- $\alpha$  and IL- $\beta$  production *in vivo* is limited during LCMV infection.**

C57BL/6 mice were infected with LCMV-WE, LCMV-Docile, or co-infected. (a) T cell tetramer gating strategy of Figure 1a-d. Representative FACS blot of Figure 1F are shown for IFN- $\gamma$  (b) and (c) TNF- $\alpha$  staining. At the indicated time points post-infection, (d) blood cells, (e) singly cell suspended splenocytes were re-stimulated with LCMV-specific CD4<sup>+</sup> T cell epitopes as indicated followed by staining for IFN- $\gamma$  and TNF- $\alpha$  (n=9-11). (f) Serum neutralizing antibodies against LCMV were determined at day 20 post-infection (n=4). (g) Serum LCMV GP specific binding antibodies were quantified at day 20 post-infection (n=4). (Error bars show SEM, \*\*p <0.01, \*\*\*p < 0.001, ###p<0.001, and ns indicates statistically not significant between the indicated groups).

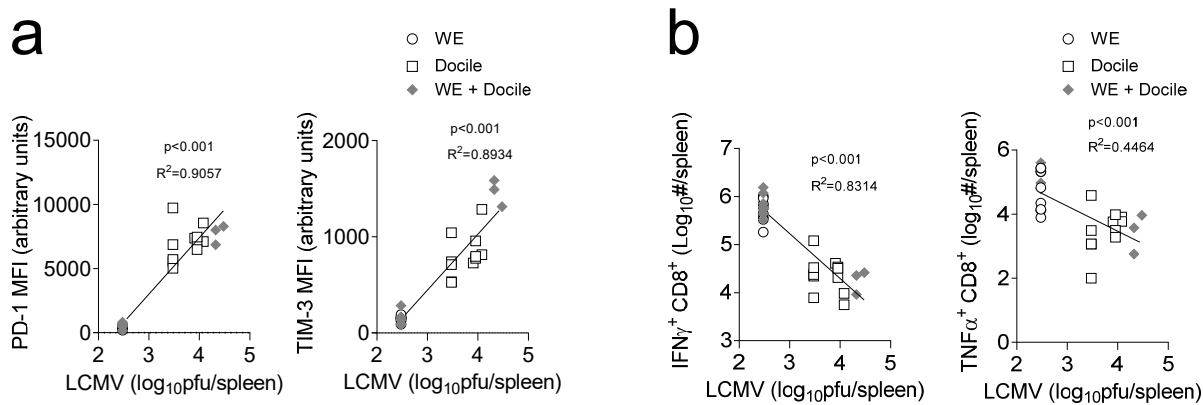

**Supplementary Figure 2: Viral presence positively correlates with T cell exhaustion.**

**(a)** PD-1 or TIM3 expression of splenic tet-gp33 from Figure 1E were plotted against spleen LCMV titers from Figure 1H. **(b)** IFN- $\gamma$  or TNF- $\alpha$  producing CD8 $^+$  T cells in response to LCMV gp33 peptides (Figure 1g) were plotted against spleen LCMV titers (Figure 1h). ( $p < 0.001$  indicates slope significantly non-zero).



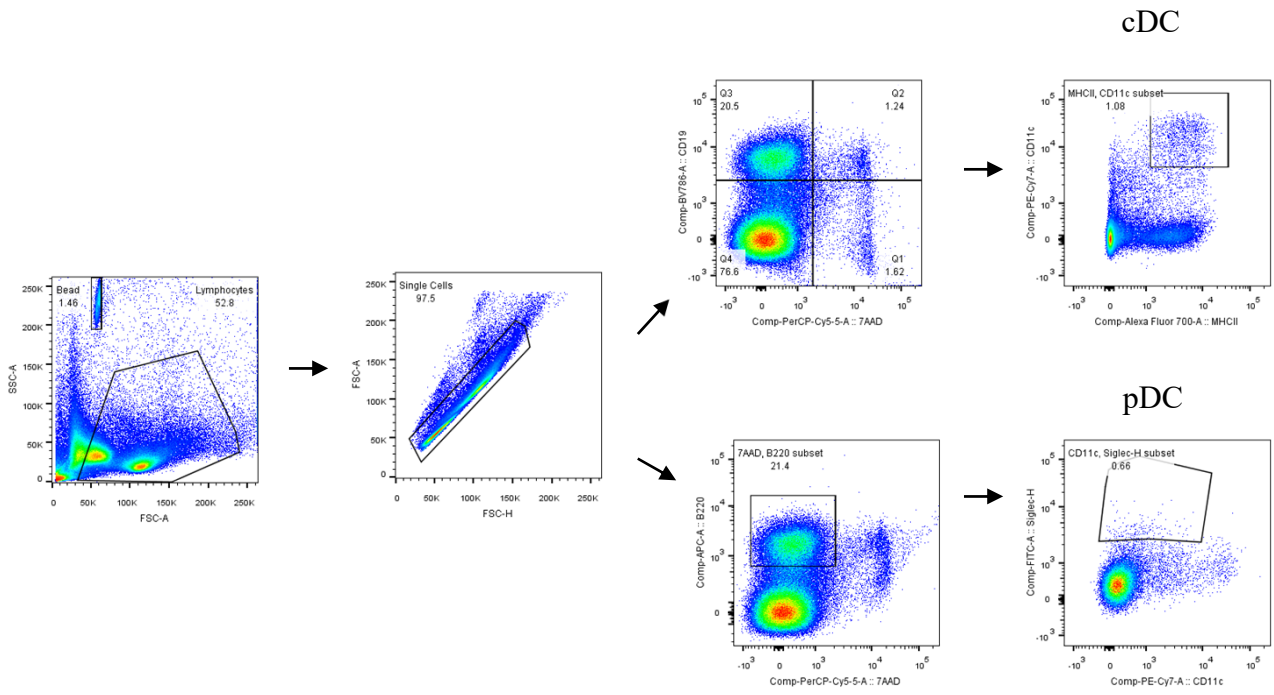

Supplementary Figure 3: cDC and pDC gating strategy of Figure 2c

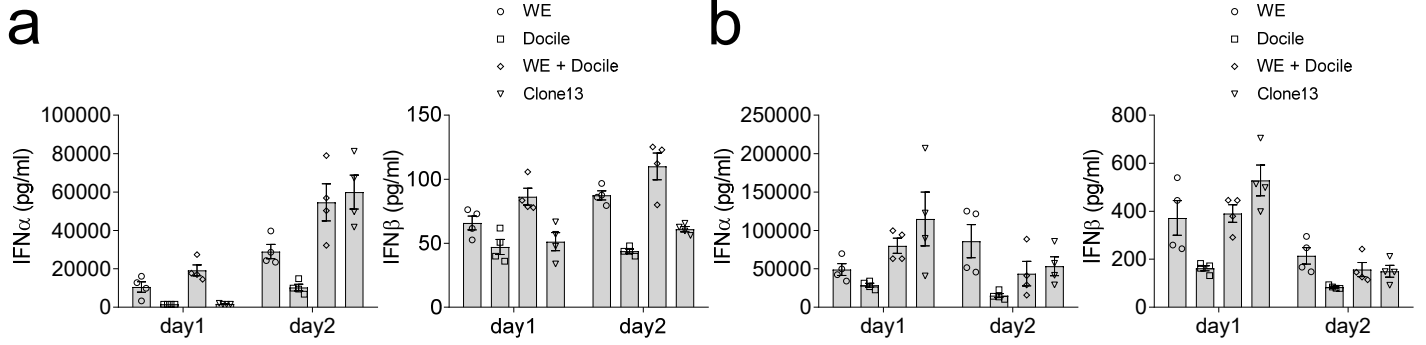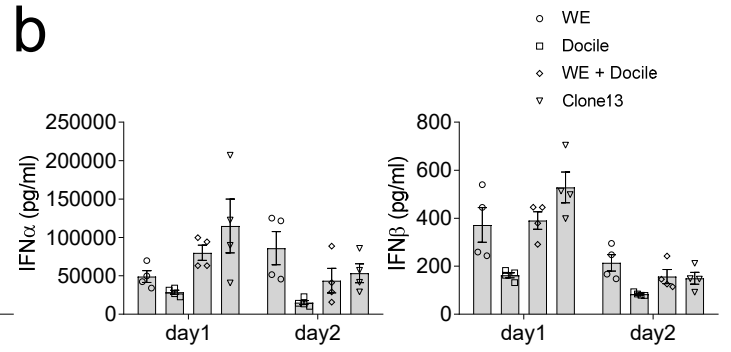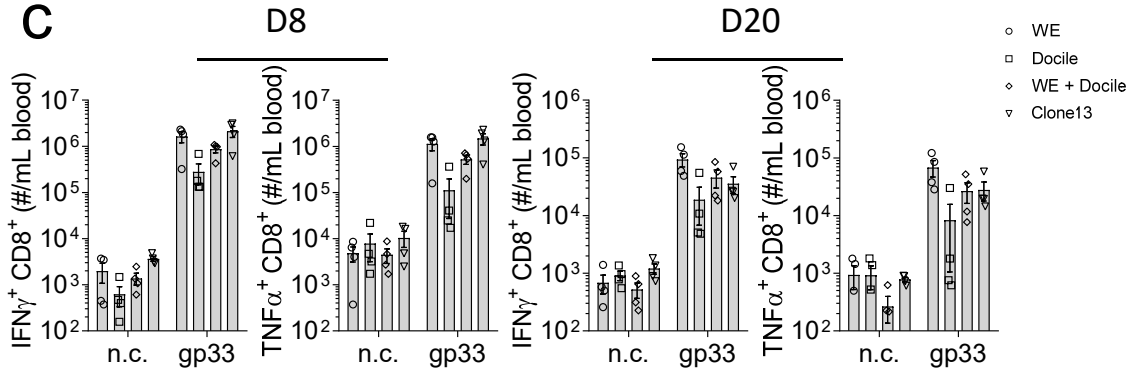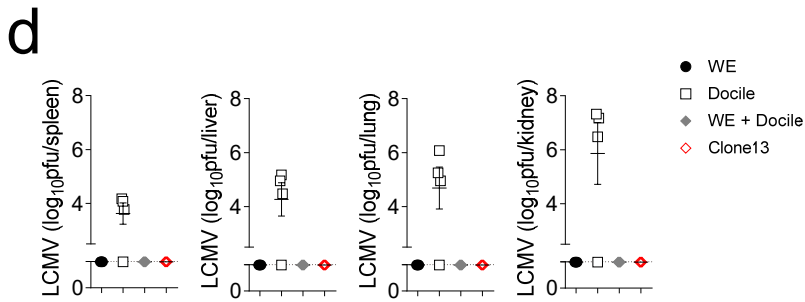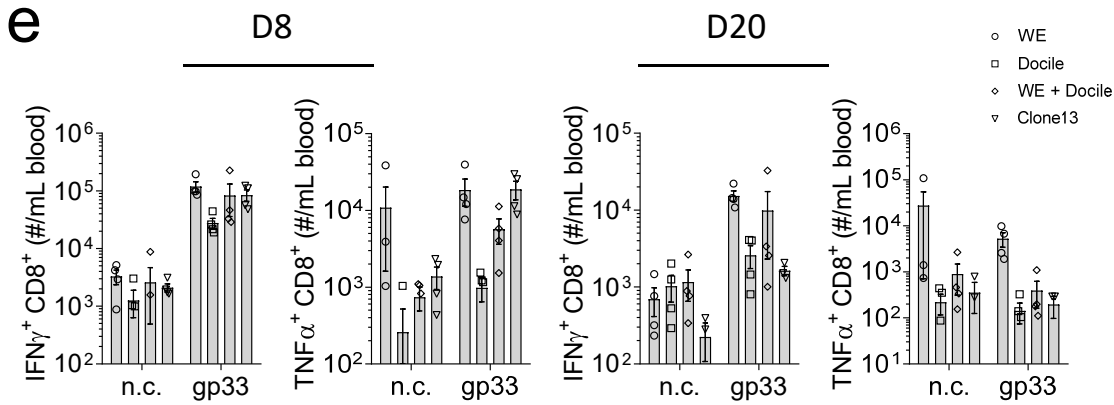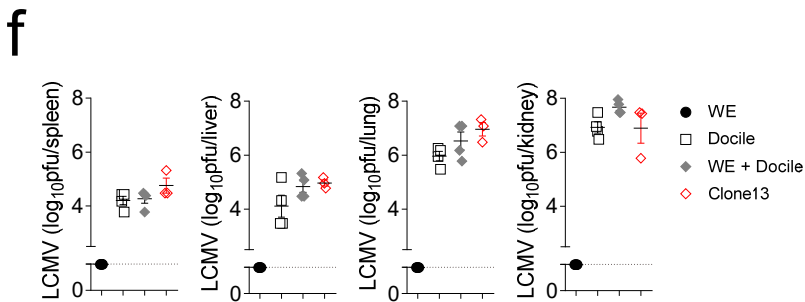

**Supplementary Figure 4: LCMV-Docile infection led to defective IFN-I production.**

C57BL/6 mice were infected with  $2 \times 10^4$  pfu (**a+c+d**) or  $2 \times 10^6$  pfu (**b+e+f**) LCMV-WE, LCMV-Docile, co-infected WE and Docile or Clone 13. (**a-b**) At indicated days post-infection, serum IFN- $\alpha$  (left panel) or IFN- $\beta$  (right panel) were quantified (n=4). (**c+e**) At day 8 or day 20 post-infection, blood cells were re-stimulated with LCMV-specific CD8<sup>+</sup> T cell epitopes as indicated or left untreated (negative control: n.c.) followed by staining for IFN- $\gamma$  and TNF- $\alpha$  (n=3-4). (**d+f**) At day 20 post-infection, virus titers were determined in the spleen, liver, lung, and kidney tissue (n=3-4).

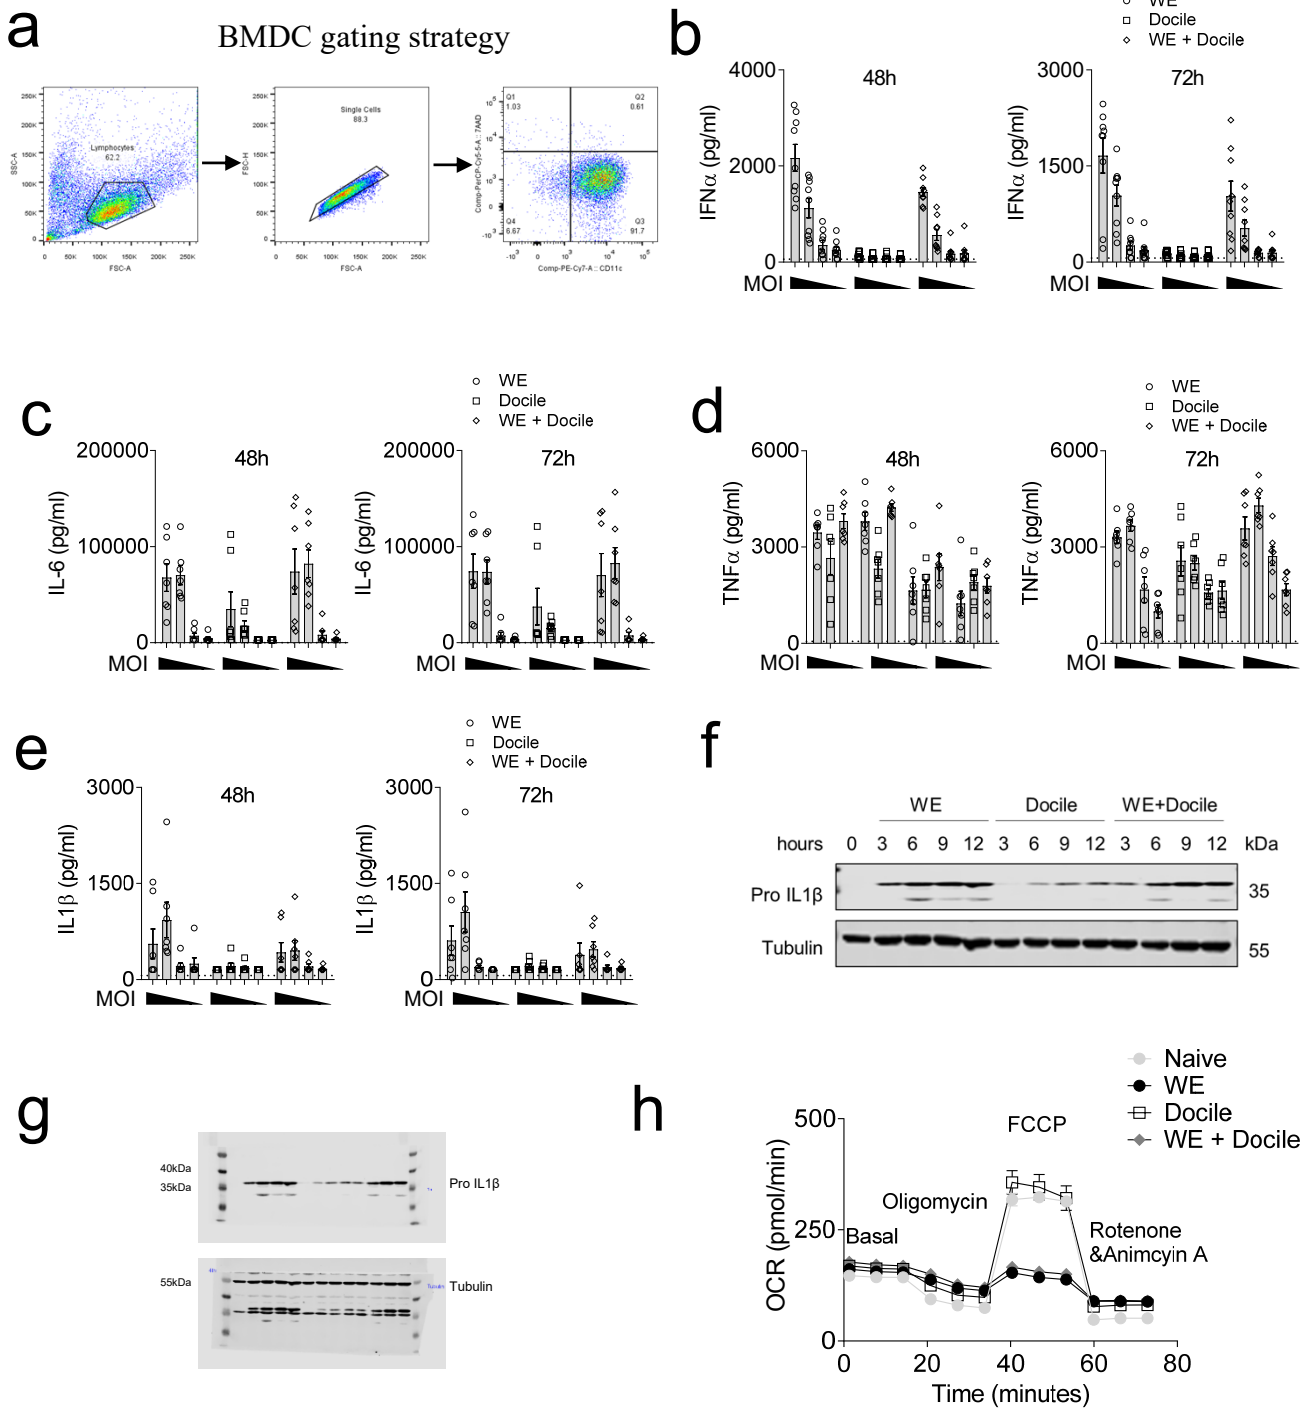

**Supplementary Figure 5: LCMV-WE infection promotes enhanced dendritic cell activation.**

**(a)** BMDC gating strategy of Figure 3a. **(b)** GM-CSF induced BMDCs were infected with LCMV-WE or LCMV-Docile, or co-infected at the indicated MOI's. IFN- $\alpha$  concentration was determined in the supernatant of infected BMDCs 48h and 72h post-infection (n=9). **(c-e)** GM-CSF induced BMDCs were infected with LCMV WE or Docile, or co-infected at the indicated MOI's, 48h, and 72h post-infection and **(c)** IL-6, **(d)** TNF- $\alpha$ , **(e)** IL-1 $\beta$  levels were determined in the supernatant of infected BMDCs (n=7). **(f)** GM-CSF induced BMDCs were infected with LCMV-WE, LCMV-Docile, or co-infected at MOI 1. At the indicated time points, IL-1 $\beta$  was determined by immunoblot analysis (A representative of n=4 immunoblots is shown). **(g)** uncrop scan of Western Blots in **(f)**, **(h)** GM-CSF induced BMDCs were infected with LCMV-WE or LCMV-Docile, or co-infected at a MOI =10. 24 h post-infection, the oxygen consumption rate (OCR) was determined in real time after the addition oligomycin, FCCP, and antimycin-A/rotenone (n=9-11).

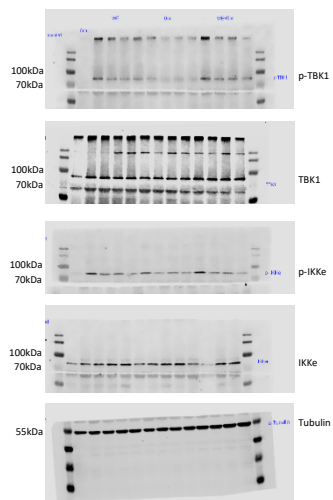

**Supplementary Figure 6: Uncropped scans of Western blots in Fig. 4a**

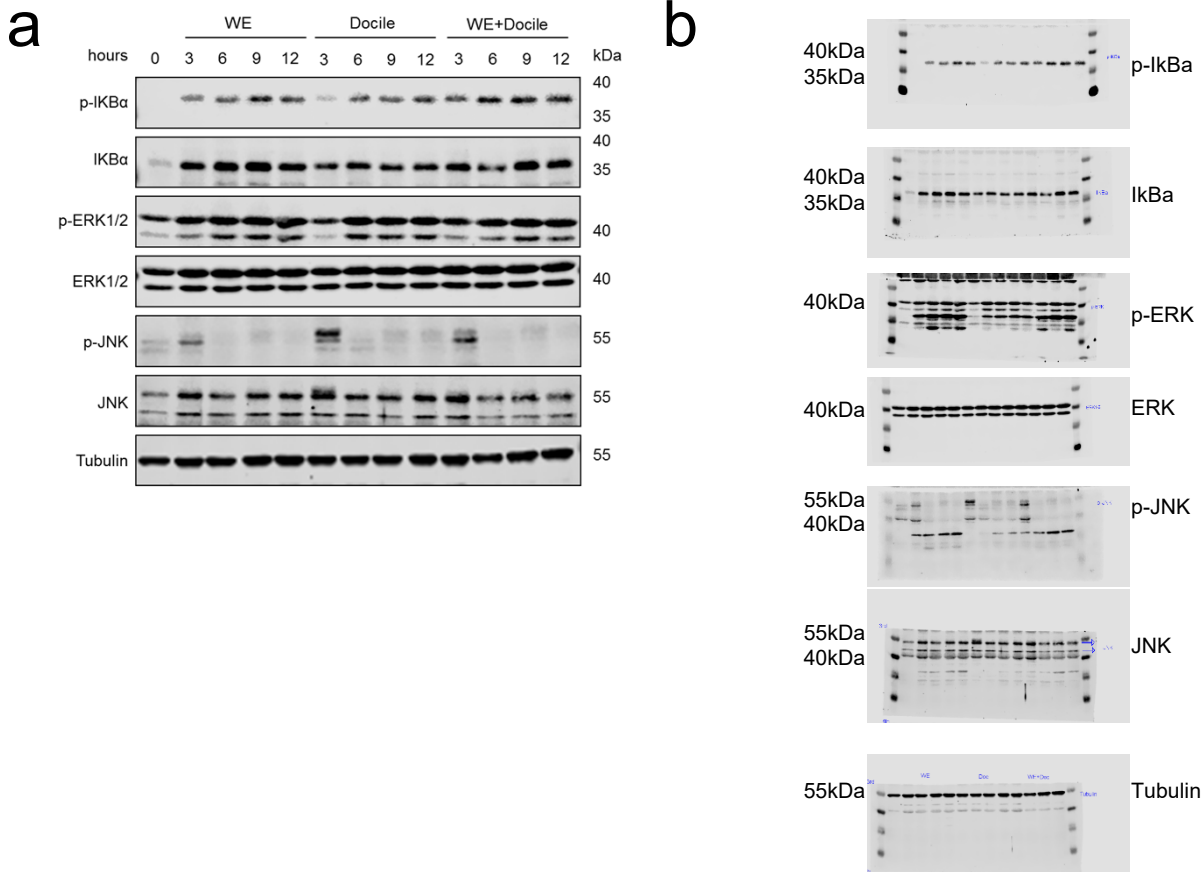

**Supplementary Figure 7: Both LCMV-WE and LCMV-Docile infections induced NF- $\kappa$ B and MAP kinase activation.**

**(a)** GM-CSF induced BMDCs were infected with LCMV-WE, LCMV-Docile, or co-infected at a MOI=1. p-IKB $\alpha$ , total IKB $\alpha$ , pERK1/2, ERK1/2, p-JNK, total JNK, and their loading control Tubulin were assessed by immunoblot analysis at the indicated time points (one of n=4 representative blot was shown). **(b)** Uncropped scans of Western blots in **(a)**.

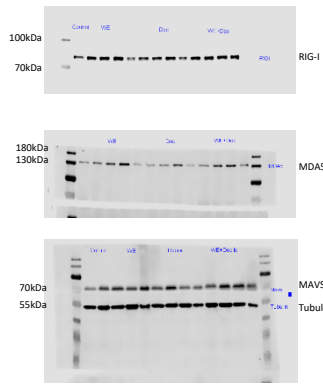

**Supplementary Figure 8: Uncropped scans of Western blots in Fig. 4d**

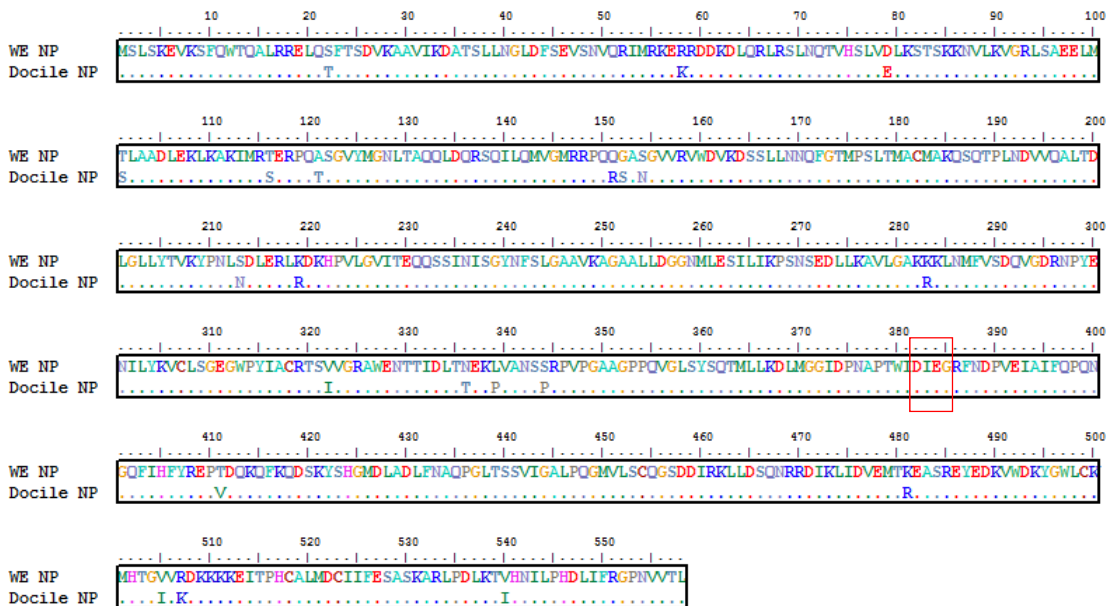

**Supplementary Figure 9: LCMV-WE and LCMV-Docile NP share the same DIEG motif**  
 NP Amino acids sequence were between WE and Docile Strain. The DIEG motif is highlighted in red box.



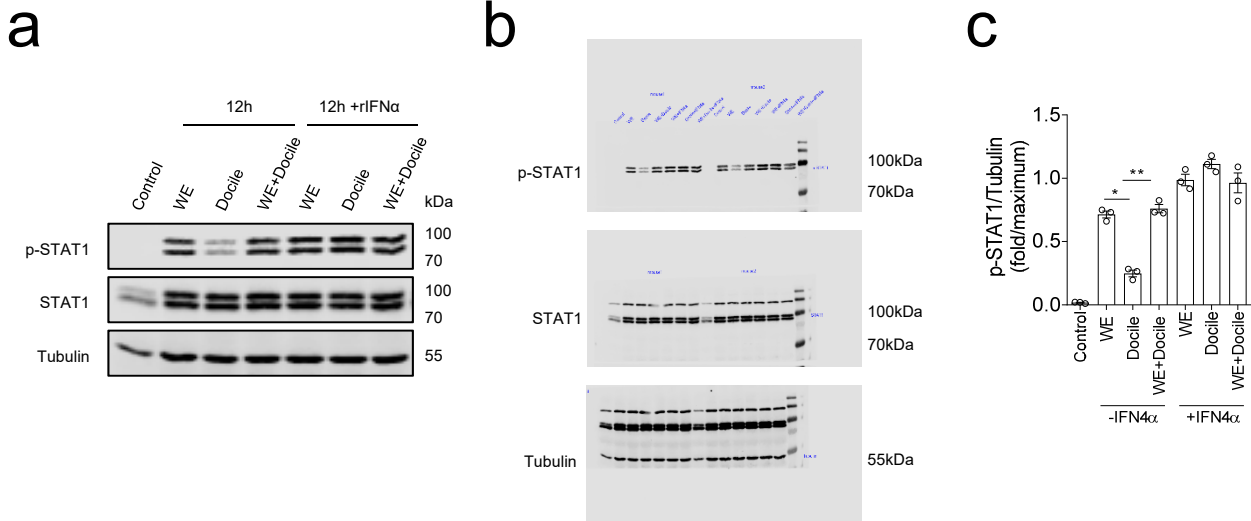

**Supplementary Figure 10: LCMV-WE and LCMV-Docile did not block IFNAR signalling.**

GM-CSF induced BMDCs were infected with LCMV-WE, LCMV-Docile, or co-infected at MOI 1. 12 h post-infection, BMDCs were treated with recombinant IFN $\alpha$ 4 at 100U/ml and 30 minutes later, (a) p-STAT1, total STAT1 were measured by immunoblotting (A representative blot of n=3 is shown). (b) Uncropped scans of Western blots in (a). (c) Quantification of (a) is shown (n=3). (Error bars show SEM, \*p<0.05, \*\*p<0.01 between the indicated groups).

LCMV GP probe

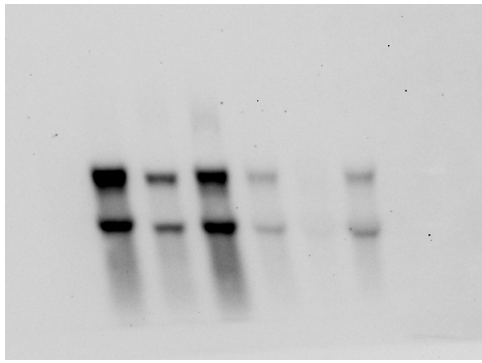

*LCMV genomic  
/anti-genomic*  
*LCMV GP  
mRNA*

LCMV NP probe

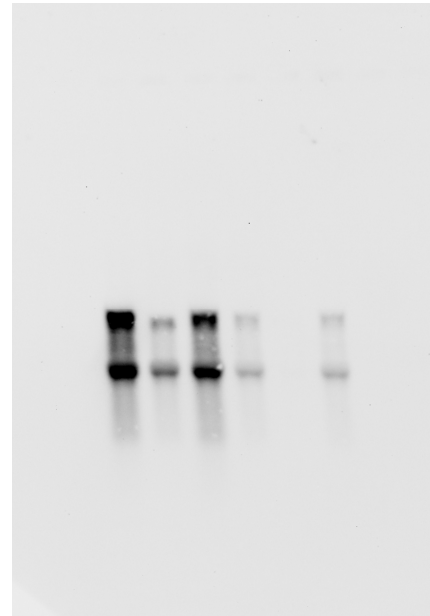

*LCMV genomic  
/anti-genomic*  
*LCMV NP  
mRNA*

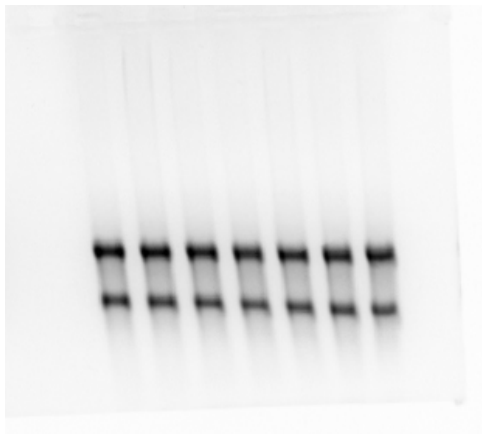

*28 S*  
*18 S*

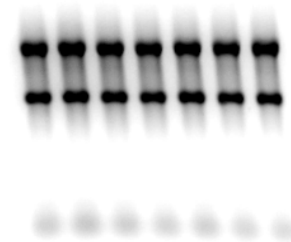

*28 S*  
*18 S*

**Supplementary Figure 11: Uncropped scans of Northern blots in Fig. 5h**

# LCMV NP staining on BHK21- cells

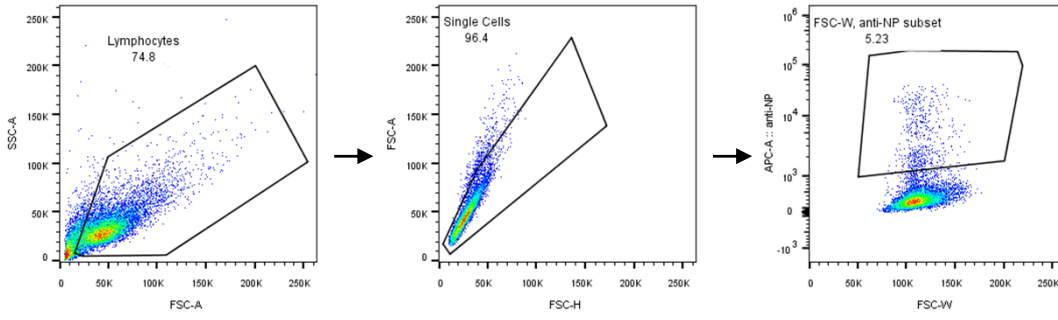

**Supplementary Figure 12: BHK-21 LCMV NP intracellular staining gate strategy of Figure 5k**

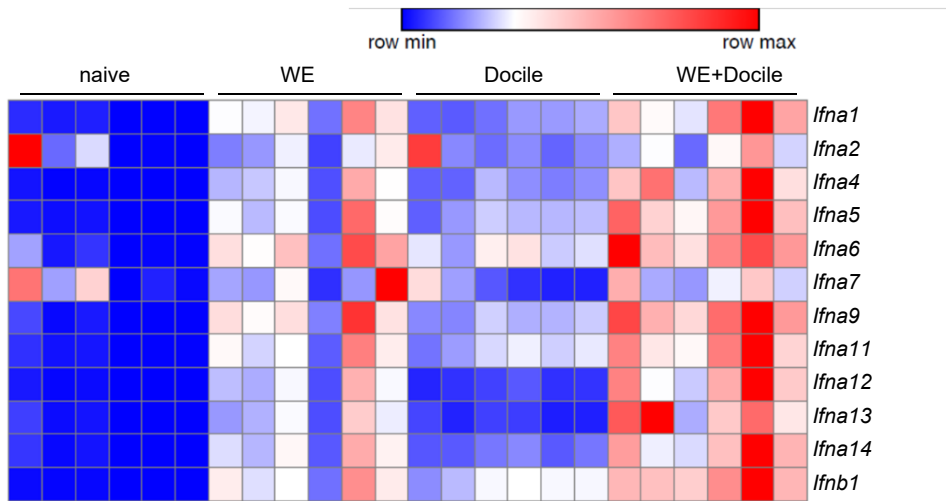

**Supplementary Figure 13: LCMV-WE infection increases IFN-I transcripts.**

C57BL/6 mice were infected with LCMV-WE, LCMV-Docile, or co-infected for 1 day. Various types of IFN-I subtype mRNA transcripts were determined in spleen tissue (n=6).

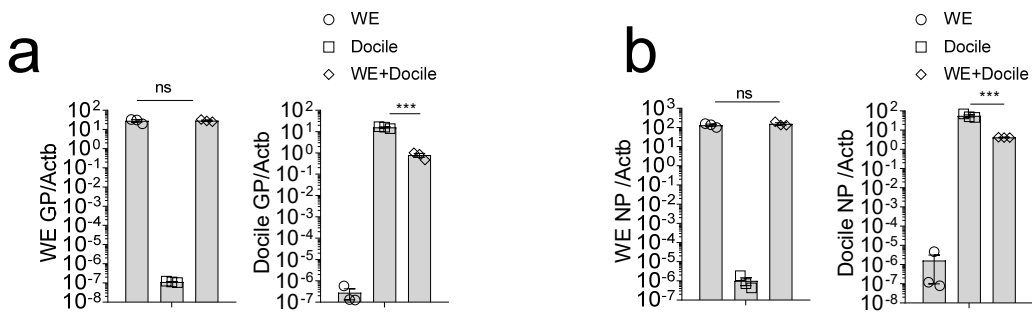

**Supplementary Figure 14: LCMV Docile RNA production was inhibited in the presence of LCMV WE.**

**(a-b)** BHK-21 cells were infected with LCMV-WE, LCMV-Docile, or both at the indicated time points (MOI=1). 24h post-infection, BHK-21 cellular RNA was isolated and **(a)** WE-GP RNA (left panel), Docile-GP RNA (right panel) **(b)** WE-NP RNA (left panel), Docile-NP RNA (right panel) were assessed by RT-PCR (n=3). (Error bars show SEM, \*\*\*p < 0.001, and ns indicates statistically not significant between the indicated groups).

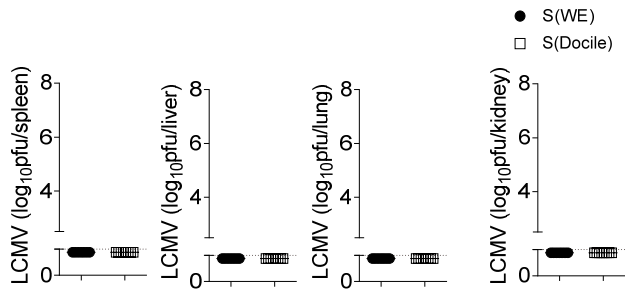

**Supplementary Figure 15: Chimeric LCMV virus is attenuated in WT animals.**

C57BL/6 mice were infected with  $2 \times 10^5$  pfu of chimeric virus S(WE)/L(Clone 13) or S(Docile)/L(Clone 13). At day 12 post-infection, virus titers were determined in spleen, liver, lung, and kidney tissue (n=7-8).
