# Supplementary material for: Slow viral propagation during initial phase of infection leads to viral persistence in mice
Source: PubMed Central journal article supplement (PMC8084999; doi:10.1038/s42003-021-02028-x), 2021-04-29
Supplement: 42003_2021_2028_MOESM2_ESM.pdf [file 42003_2021_2028_MOESM2_ESM.pdf]

## Description of Additional Supplementary Files

**File name:** Supplementary Data 1

**Description:** Source data for the main figures.
