# Supplementary material for: Slow viral propagation during initial phase of infection leads to viral persistence in mice
Source: PubMed Central journal article supplement (PMC8084999; doi:10.1038/s42003-021-02028-x), 2021-04-29
Supplement: 42003_2021_2028_MOESM4_ESM.pdf [file 42003_2021_2028_MOESM4_ESM.pdf]

## Reporting Summary

Nature Research wishes to improve the reproducibility of the work that we publish. This form provides structure for consistency and transparency in reporting. For further information on Nature Research policies, see our [Editorial Policies](#) and the [Editorial Policy Checklist](#).

### Statistics

For all statistical analyses, confirm that the following items are present in the figure legend, table legend, main text, or Methods section.

n/a Confirmed

- The exact sample size ( $n$ ) for each experimental group/condition, given as a discrete number and unit of measurement
- A statement on whether measurements were taken from distinct samples or whether the same sample was measured repeatedly
- The statistical test(s) used AND whether they are one- or two-sided  
*Only common tests should be described solely by name; describe more complex techniques in the Methods section.*
- A description of all covariates tested
- A description of any assumptions or corrections, such as tests of normality and adjustment for multiple comparisons
- A full description of the statistical parameters including central tendency (e.g. means) or other basic estimates (e.g. regression coefficient) AND variation (e.g. standard deviation) or associated estimates of uncertainty (e.g. confidence intervals)
- For null hypothesis testing, the test statistic (e.g.  $F$ ,  $t$ ,  $r$ ) with confidence intervals, effect sizes, degrees of freedom and  $P$  value noted  
*Give  $P$  values as exact values whenever suitable.*
- For Bayesian analysis, information on the choice of priors and Markov chain Monte Carlo settings
- For hierarchical and complex designs, identification of the appropriate level for tests and full reporting of outcomes
- Estimates of effect sizes (e.g. Cohen's  $d$ , Pearson's  $r$ ), indicating how they were calculated

*Our web collection on [statistics for biologists](#) contains articles on many of the points above.*

### Software and code

Policy information about [availability of computer code](#)

Data collection LI-COR Odyssey Infrared Imaging System (Western Blot), BD FACS DIVA of BD Fortessa (Flow cytometry), Prism Genetic Analyzer 3130-16 Applied Biosystems (DNA sequencing), Lumi-Imager™ F1 INTAS (Northern Blot), QuantStudio Real-Time PCR system

Data analysis Image J Software, Graph Pad Prism, BioEdit, Flow Jo Software

For manuscripts utilizing custom algorithms or software that are central to the research but not yet described in published literature, software must be made available to editors and reviewers. We strongly encourage code deposition in a community repository (e.g. GitHub). See the Nature Research [guidelines for submitting code & software](#) for further information.

### Data

Policy information about [availability of data](#)

All manuscripts must include a [data availability statement](#). This statement should provide the following information, where applicable:

- Accession codes, unique identifiers, or web links for publicly available datasets
- A list of figures that have associated raw data
- A description of any restrictions on data availability

The authors declare that all data supporting the findings of this study are available within the article and its Supplementary Information files, or are available from the authors upon request.

## Field-specific reporting

Please select the one below that is the best fit for your research. If you are not sure, read the appropriate sections before making your selection.

Life sciences       Behavioural & social sciences       Ecological, evolutionary & environmental sciences

For a reference copy of the document with all sections, see [nature.com/documents/nr-reporting-summary-flat.pdf](https://www.nature.com/documents/nr-reporting-summary-flat.pdf)

## Life sciences study design

All studies must disclose on these points even when the disclosure is negative.

|                 |                                                                                                                                                                                                                                         |
|-----------------|-----------------------------------------------------------------------------------------------------------------------------------------------------------------------------------------------------------------------------------------|
| Sample size     | No statistical method to determine sample size was performed. Number of animals per group was chosen based on previous experiments with similar experimental set-up.                                                                    |
| Data exclusions | No data was excluded from the analysis.                                                                                                                                                                                                 |
| Replication     | Experiments were performed with at least three different biological replicates. Attempts at replication were successful.                                                                                                                |
| Randomization   | Mice were randomized prior to each experiment                                                                                                                                                                                           |
| Blinding        | Investigators were not blinded for the in vivo experiments as the experiments were carried out by one person. However some key samples i.e. titer, serum cytokines were analyzed by different person without knowledge of the sample ID |

## Reporting for specific materials, systems and methods

We require information from authors about some types of materials, experimental systems and methods used in many studies. Here, indicate whether each material, system or method listed is relevant to your study. If you are not sure if a list item applies to your research, read the appropriate section before selecting a response.

### Materials & experimental systems

| n/a                                 | Involved in the study                                           |
|-------------------------------------|-----------------------------------------------------------------|
| <input type="checkbox"/>            | <input checked="" type="checkbox"/> Antibodies                  |
| <input type="checkbox"/>            | <input checked="" type="checkbox"/> Eukaryotic cell lines       |
| <input checked="" type="checkbox"/> | <input type="checkbox"/> Palaeontology and archaeology          |
| <input type="checkbox"/>            | <input checked="" type="checkbox"/> Animals and other organisms |
| <input checked="" type="checkbox"/> | <input type="checkbox"/> Human research participants            |
| <input checked="" type="checkbox"/> | <input type="checkbox"/> Clinical data                          |
| <input checked="" type="checkbox"/> | <input type="checkbox"/> Dual use research of concern           |

### Methods

| n/a                                 | Involved in the study                              |
|-------------------------------------|----------------------------------------------------|
| <input checked="" type="checkbox"/> | <input type="checkbox"/> ChIP-seq                  |
| <input type="checkbox"/>            | <input checked="" type="checkbox"/> Flow cytometry |
| <input checked="" type="checkbox"/> | <input type="checkbox"/> MRI-based neuroimaging    |

## Antibodies

Antibodies used

FITC-IL7R Invitrogen 11-1271-85 Clone: A7R34 Dilution factor: 1:300  
 PE-CF594 -PD-1 Biosciences 562523 Clone: J43 Dilution factor: 1:300  
 PE-TIM3 Invitrogen 12-5870-82 Clone: RMT3-23 Dilution factor: 1:300  
 BV711-Lag3 Biosciences 563179 Clone: C9B7W Dilution factor: 1:300  
 BV510-CD62L Biosciences 563117 Clone: MEL-14 Dilution factor: 1:300  
 PE-cy7-CXCR5 Biosciences 560617 Clone: 2G8 Dilution factor: 1:300  
 BV786-CD44 Biosciences 563736 Clone: IM7 Dilution factor: 1:300  
 eFluor 450-KLRG1 Invitrogen 48-5893-82 Clone: 2F1 Dilution factor: 1:300  
 FITC-SiglecH Invitrogen 11-0333-82 Clone: eBio440c Dilution factor: 1:300  
 PE-F4/80 Invitrogen 12-4801-82 Clone: BM8 Dilution factor: 1:300  
 PE-cy7-CD11c Invitrogen 25-0114-82 Clone: N418 Dilution factor: 1:300  
 APC-B220 Invitrogen 17-0452-82 Clone: RA3-6B2 Dilution factor: 1:300  
 Alexa Fluor 700-MHCII Invitrogen 56-5321-82 Clone: M5/114.15.2 Dilution factor: 1:300  
 BV421-CD40 Biosciences 562846 Clone: 3/23 Dilution factor: 1:300  
 BV510-CD86 Biosciences 563077 Clone: GL1 Dilution factor: 1:300  
 BV605-CD11b Biosciences 563015 Clone: M1/70 Dilution factor: 1:300  
 BV650-CD80 Biosciences 563687 Clone: 16-10A1 Dilution factor: 1:300  
 BV711-CD8 Biosciences 563046 Clone: 53-6.7 Dilution factor: 1:300  
 BV786-CD19 Biosciences 563333 Clone: 1D3 Dilution factor: 1:300  
 FITC-CD40 Invitrogen 11-0402-82 Clone: HM40-3 Dilution factor: 1:300

PE-CD86 Invitrogen 12-0862-82 Clone: GL1 Dilution factor: 1:300  
 APC-CD80 Invitrogen 17-0801-82 Clone: 16-10A1 Dilution factor: 1:300  
 APC-eFluor 780-MHCl Invitrogen 47-5321-82 Clone: M5/114.15.2 Dilution factor: 1:300  
 PerCP-eFluor 710-CD8 Invitrogen 46-0081-82 Clone: 53-6.7 Dilution factor: 1:300  
 PerCP-eFluor 710-CD4 Invitrogen 46-0041-82 Clone: GK1.5 Dilution factor: 1:300  
 APC-IFN gamma Invitrogen 17-7311-82 Clone: XMG1.2 Dilution factor: 1:300  
 eFluor 450-TNF alpha Invitrogen 48-7321-82 Clone: MP6-XT22 Dilution factor: 1:300  
 PerCP-Cyanine5.5-IL2 Invitrogen 45-7021-82 Clone: JES6-5H4 Dilution factor: 1:300  
 PE-CD8 Invitrogen 12-0083-82 Clone: eBioH35-17.2 Dilution factor: 1:300  
 PE-CD4 Invitrogen 12-0041-82 Clone: GK1.5 Dilution factor: 1:300  
 APC-Donkey Anti-Rat IgG (H+L) Jacksonimmuno 712-136-150 Polyclonal Dilution factor: 1:200  
 Unlabelled Rat anti-*LCMV NP* Made in house N/A VL-4 Dilution factor: 1:100  
 RIG-I (D14G6) antibody Cell Signaling Technology Cat #3743  
 MDA-5 (D74E4) antibody Cell Signaling Technology Cat #5321  
 MAVS(C-1) Santa Cruz Cat #365333  
 Phospho-TBK1/NAK(Ser172) (D52C2) antibody Cell Signaling Technology Cat #5483  
 Phospho-IKKe (Ser172) (D1B7) Cell Signaling Technology Cat #8766  
 TBK1/NAK antibody Cell Signaling Technology Cat #3013  
 IKKe antibody Cell Signaling Technology Cat #2690  
 Phospho-IRF-7 (Ser437/438) (D6M2I) antibody Cell Signaling Technology Cat #24129  
 IRF-7 antibody Abcam Cat #ab109255  
 Phospho-IkBa (Ser32/36) (5A5) antibody Cell Signaling Technology Cat #9246  
 IkBa (44D4) antibody Cell Signaling Technology Cat #4812  
 Phospho-p44/42 MAPK (Erk1/2) (Thr202/Tyr204) (E10) antibody Cell Signaling Technology Cat #9106  
 p44/42 MAPK (Erk1/2) (137F5) antibody Cell Signaling Technology Cat #4695  
 Phospho-SAPK/JNK (Thr183/Tyr185) (81E11) antibody Cell Signaling Technology Cat #4668  
 SAPK/JNK antibody Cell Signaling Technology Cat #9252  
 IL-1 $\beta$  (D6D6T) antibody Cell Signaling Technology Cat #31202  
 Phospho-Stat1 (Tyr701) (58D6) antibody Cell Signaling Technology Cat #9167  
 Stat1 antibody Cell Signaling Technology Cat #9172  
 $\beta$ -Tubulin (9F3) antibody Cell Signaling Technology Cat #5346

## Validation

We use the manufactures' validated antibodies and available information can be inferred form the catalog number and found on websites.

## Eukaryotic cell lines

### Policy information about [cell lines](#)

|                                                                   |                                                                                                                                               |
|-------------------------------------------------------------------|-----------------------------------------------------------------------------------------------------------------------------------------------|
| Cell line source(s)                                               | BHK-21 [C-13] (ATCC® CCL-10™), MC57G (ATCC® CRL-2295™) were from ATCC, L929 and VL4 hybridoma were provided by Dr. Karl Lang, Essen, Germany) |
| Authentication                                                    | Cell lines used were not authenticated                                                                                                        |
| Mycoplasma contamination                                          | BHK-21, MC57G and L929 cell line were tested negative for mycoplasma. VL4 hybridoma was not tested for mycoplasma                             |
| Commonly misidentified lines (See <a href="#">ICLAC</a> register) | No commonly misidentified cell lines were used                                                                                                |

## Animals and other organisms

### Policy information about [studies involving animals](#); [ARRIVE guidelines](#) recommended for reporting animal research

|                         |                                                                                                                  |
|-------------------------|------------------------------------------------------------------------------------------------------------------|
| Laboratory animals      | Mice were on a C57BL/6J genetic background, 6-20 weeks old                                                       |
| Wild animals            | No Wild animals used in this study                                                                               |
| Field-collected samples | The study did not involve samples collectedd from the field                                                      |
| Ethics oversight        | Experiments were performed under the authorization of LANUV in accordance with German law for animal protection. |

Note that full information on the approval of the study protocol must also be provided in the manuscript.

## Plots

Confirm that:

- The axis labels state the marker and fluorochrome used (e.g. CD4-FITC).
- The axis scales are clearly visible. Include numbers along axes only for bottom left plot of group (a 'group' is an analysis of identical markers).
- All plots are contour plots with outliers or pseudocolor plots.
- A numerical value for number of cells or percentage (with statistics) is provided.

## Methodology

Sample preparation

For tetramer staining: single suspended cells were incubated with tet-gp33 (15 minutes), tet-np396 (15 minutes) or tet-gp61 (30 minutes) at 37°C. Followed by surface antibody staining for 30 minutes at 4°C. Blood samples were lysed with BD RBC lysis Buffer before FACS.

For Intracellular cytokine staining, samples were incubated with CD8 or CD4 antibody overnight at 4°C. Then samples were fixed with 2% Formalin in PBS at room temperature for 10 minutes, followed by 2 times washing with Saponin containing FACS buffer (1%FCS, 5mM EDTA in PBS), then samples were incubated with IFN- $\gamma$ , TNF $\alpha$  antibodies for 30 minutes before FACS

For DC staining, single cells were incubated with FC block (1:25 dilution) for 10 minutes at 4°C followed by surface antibodies staining for 30 minutes at 4°C. Viability dye such as 7-AAD were added prior to FACS

For LCMV-NP staining, cells were fixed with 2% Formalin in PBS at room temperature for 10 minutes, followed by 2 times washing with Saponin containing FACS buffer, then cells were incubated with anti-LCMV NP (VL4, 1:10 dilution) for 30 minutes at 4°C. Cells were washed again with Saponin containing FACS buffer, followed by incubation with Donkey anti-Rat secondary antibodies for 30 minutes at room temperature.

Instrument

BD Fortessa

Software

BD FACSDiva Software was used for collecting and analyzing the flow cytometry data. Flowjo was also used for analyzing data.

Cell population abundance

Not Applicable

Gating strategy

General: Leukocytes (FCS-A, SSC-A), doublets exclusion (FSC-H, FSC-A).

For tetramer: tet and CD8 double positive, CD19 negative

For short lived effector cells (SLEC): after tetramer gating, IL7R negative and KLRG1 positive, for memory precursor cells (MEPC) after tetramer gating IL7R positive and KLRG1 negative

For ICS: IFN $\gamma$  or TNF $\alpha$  and CD8 or CD4 double positive

For primary cDC: pregate on CD19 negative and 7-AAD negative, followed by gating on MHC-II and CD11c positive.

For primary pDC: pregate on 7-AAD negative and B220 positive, followed by gating on Siglec-H positive and CD11c intermediate

For BMDC: 7-AAD negative and CD11c positive

For LCMV NP: pregate on BHK-21 cells followed by gating on LCMV-NP positive cells

- Tick this box to confirm that a figure exemplifying the gating strategy is provided in the Supplementary Information.
